# Supplementary material for: A new knockdown resistance (kdr) mutation, F1534L, in the voltage-gated sodium channel of Aedes aegypti, co-occurring with F1534C, S989P and V1016G
Source: PubMed Central journal article supplement (PMC7325290; doi:10.1186/s13071-020-04201-3), 2020-06-29
Supplement: 13071_2020_4201_MOESM1_ESM.pdf [file 13071_2020_4201_MOESM1_ESM.pdf]

**Additional file 1: Table S1.** Frequency of individuals with different genotype combinations at residues F1534, S989 and V1016.

|  | Genotype* |      |       | N (frequency) |
|--|-----------|------|-------|---------------|
|  | F1534     | S989 | V1016 |               |
|  | FF        | SS   | VV    | 29 (0.04)     |
|  | FC        | SS   | VV    | 147 (0.18)    |
|  | FL        | SS   | VV    | 37 (0.05)     |
|  | CC        | SS   | VV    | 216 (0.27)    |
|  | LL        | SS   | VV    | 17 (0.02)     |
|  | LC        | SS   | VV    | 157 (0.19)    |
|  | FF        | SP   | VG    | 45 (0.06)     |
|  | FC        | SP   | VG    | 108 (0.13)    |
|  | FL        | SP   | VG    | 29 (0.04)     |
|  | CC        | SP   | VG    | 0             |
|  | LL        | SP   | VG    | 0             |
|  | LC        | SP   | VG    | 0             |
|  | FF        | PP   | GG    | 29 (0.04)     |
|  | FC        | PP   | GG    | 0             |
|  | FL        | PP   | GG    | 0             |
|  | CC        | PP   | GG    | 0             |
|  | LL        | PP   | GG    | 0             |
|  | LC        | PP   | GG    | 0             |

\*All samples were homozygous (TT) at residue T1520
