# Supplementary material for: A new knockdown resistance (kdr) mutation, F1534L, in the voltage-gated sodium channel of Aedes aegypti, co-occurring with F1534C, S989P and V1016G
Source: PubMed Central journal article supplement (PMC7325290; doi:10.1186/s13071-020-04201-3), 2020-06-29
Supplement: 13071_2020_4201_MOESM2_ESM.pdf [file 13071_2020_4201_MOESM2_ESM.pdf]

**Additional file 2: Text S1.** Estimation of gametic phase from multi-locus diploid data based on a Gibbs sampling strategy.

Number of individuals : 814  
Number of ambiguous individuals : 182  
Number of loci : 3  
Number of polymorphic loci : 3

List of estimated haplotype frequencies

-----

| [Hapl. ID] | Hapl. freq. | Haplotype definition |
|------------|-------------|----------------------|
| =====      | =====       | =====                |
| [ 1]       | 287 (0.176) | S V F                |
| [ 2]       | 844 (0.518) | S V C                |
| [ 3]       | 257 (0.158) | S V L                |
| [ 4]       | 240 (0.147) | P G F                |
